# Supplementary material for: New Molecular Mechanism Underlying Myc‐Mediated Cytochrome P450 2E1 Upregulation in Apoptosis and Energy Metabolism in the Myocardium
Source: PubMed Central journal article supplement — J Am Heart Assoc. 2018 Dec 19;8(1):e009871. doi: 10.1161/JAHA.118.009871 (PMC6405704; doi:10.1161/jaha.118.009871), 2018-12-19
Supplement: JAH3-8-e009871-s001.pdf [file JAH3-8-e009871-s001.pdf]

# **SUPPLEMENTAL MATERIAL**

**Table S1. The oligonucleotide/primer sequences in this study.**

| Name                               | Sequence (5'→3')                   | Application    |
|------------------------------------|------------------------------------|----------------|
| CYP2E1-ov forward                  | CCAAGTTGGCAAAGCGCT                 | Genotyping for |
| CYP2E1-ov reverse                  | AAAAGACCAAAGGCCAGCC                | Cyp2e1-ov mice |
| CYP2E1-kd forward                  | GGCATGGACGAGCTGTACAA               | Genotyping for |
| CYP2E1-kd reverse                  | CTCTAGATCAACCACTTTGT               | Cyp2e1-kd mice |
| CYP2E1-ChIP<br>forward             | CCTGGATGAACAAGCACA                 | ChIP           |
| CYP2E1-ChIP<br>reverse             | GGCAAGAGCACCTGAAAG                 | PCR primer     |
| pGL3-cyp2e1(-<br>350~+37) forward  | GGAATGGTACCCCAGTGCCATG<br>GGGAAGAC | PCR primer     |
| pGL3-cyp2e1(-<br>350~+37) reverse  | TTCTCGAGAGACAAGCAAGGC<br>AACGGT    | PCR primer     |
| pGL3-cyp2e1(-<br>700~+37) forward  | GGAATGGTACCTGCCTAGCATG<br>TGCAAGGC | PCR primer     |
| pGL3-cyp2e1(-<br>700~+37) reverse  | TTCTCGAGAGACAAGCAAGGC<br>AACGGT    | PCR primer     |
| pGL3-cyp2e1(-<br>855~+37) forward  | GGAATGGTACCTGGATGAAC<br>AAGCACATG  | PCR primer     |
| pGL3-cyp2e1(-<br>855~+37) reverse  | TTCTCGAGAGACAAGCAAGGC<br>AACGGT    | PCR primer     |
| pGL3-cyp2e1(-<br>1508~+37) forward | GGAATGGTACCTCCTGCTCTCG<br>GGACCTTT | PCR primer     |
| pGL3-cyp2e1(-<br>1508~+37) reverse | TTCTCGAGAGACAAGCAAGGC<br>AACGGT    | PCR primer     |

ChIP, chromatin immunoprecipitation assay.

**Table S2. The sequencing results of the mutated vectors in this study.**

| Name                                    | Sequence (5'→3')                                                                                                                                                                                                                                                                                                                                                                                                                                                                                                                                                                                                                                                                                                                                                                                                                                                                                                                                                                                                    |
|-----------------------------------------|---------------------------------------------------------------------------------------------------------------------------------------------------------------------------------------------------------------------------------------------------------------------------------------------------------------------------------------------------------------------------------------------------------------------------------------------------------------------------------------------------------------------------------------------------------------------------------------------------------------------------------------------------------------------------------------------------------------------------------------------------------------------------------------------------------------------------------------------------------------------------------------------------------------------------------------------------------------------------------------------------------------------|
| pGL3-<br>0.9cyp2e1(CEBP<br>and MYC mut) | >cyp2e1(-850~+36,delete -846~-835 and -756~-743)<br>ggtaccCTGGATGAAACAAATCCAATTTTAAAAAATTTCTTCTTTTTTCTTCTGTATTTGACAA<br>AGTGTTTTGAAAAACATTTCCACCTAAGTGGGGCTGTTGAAGGAC<br>AGGTAGTACCTTTCAGGTGCTCTTGCCTAGCATGTGCAAGGCCCTGGGTTTGGTCCTTGG<br>CACTGCAAATATTCGCTTACACAGACACTCAGAATATCTCAAAGTGCTTTAGCTTTATTT<br>ACCTCTACTTTTTTGCCTCCATGGAATTTTCTGGTTGATTTGACAACGTGAAATGGGATC<br>CAGAAGTGAGATTTCTGTTCTGCCCTCAATTTCCAGGTGGGCCATTAGGGTTGTGGTGC<br>CAGATCAGAAGTTAGAGGTCTGCAGCCTAGTGCTGTCTTTGGCCTGGAATGAGCAGTAAA<br>TGGTTGGAAAAAAACCTTTCCAGCAAACAAACACATGCAAACATGATCTGAATGCATG<br>CCTTCTGTGCTGACCAGTGCCATGGGGAAGACATTCCCCACCCCCAGGACTGACCTATG<br>AATTGGTGAGGTATTCCTACATGTACTIONACCAGCACCTGACAGGTGCCAGCAACCAGAG<br>GATTGGCAGGGCCCAGCCTCATCCTTGTCAGATCAGTAGATGCAACTTCTAAGAGGCAAT<br>GGCTCCAAGGGTCAGCCTTTGAAATGATAGCCAACTGCAGCTAATAATAAACCAGCACTT<br>TAGGCCAAGGGAGATGAGTGGTTATTGGCTGATGAGCCACCCTCCTTCTCAACGACACGT<br>TATAAAATCCTTGTTTCTCCTCAGGAAATTCCTACAAATTTAGAGTGGAGCCCCATCGGC<br>ACCATGGCGGTTCTTGGCATCACCGTTGCCTTGCTTGCTCTCGAG |
| pGL3-<br>0.9cyp2e1(CEBP<br>mut)         | >cyp2e1(-850~+36,delete -846~-835)<br>ggtaccCTGGATGAAACAAATCCAATTTTAAAAAATTTCTTCTTTTTTCTTCTGTATTTGACAA<br>AGTGTTTTGAAAAACATTTCCACCTACATTTTACAAATAAGTGGGGCTGTTGAAGGAC<br>AGGTAGTACCTTTCAGGTGCTCTTGCCTAGCATGTGCAAGGCCCTGGGTTTGGTCCTTGG<br>CACTGCAAATATTCGCTTACACAGACACTCAGAATATCTCAAAGTGCTTTAGCTTTATTT<br>ACCTCTACTTTTTTGCCTCCATGGAATTTTCTGGTTGATTTGACAACGTGAAATGGGATC<br>CAGAAGTGAGATTTCTGTTCTGCCCTCAATTTCCAGGTGGGCCATTAGGGTTGTGGTGC<br>CAGATCAGAAGTTAGAGGTCTGCAGCCTAGTGCTGTCTTTGGCCTGGAATGAGCAGTAAA<br>TGGTTGGAAAAAAACCTTTCCAGCAAACAAACACATGCAAACATGATCTGAATGCATG<br>CCTTCTGTGCTGACCAGTGCCATGGGGAAGACATTCCCCACCCCCAGGACTGACCTATG<br>AATTGGTGAGGTATTCCTACATGTACTIONACCAGCACCTGACAGGTGCCAGCAACCAGAG<br>GATTGGCAGGGCCCAGCCTCATCCTTGTCAGATCAGTAGATGCAACTTCTAAGAGGCAAT<br>GGCTCCAAGGGTCAGCCTTTGAAATGATAGCCAACTGCAGCTAATAATAAACCAGCACTT<br>TAGGCCAAGGGAGATGAGTGGTTATTGGCTGATGAGCCACCCTCCTTCTCAACGACACGT<br>TATAAAATCCTTGTTTCTCCTCAGGAAATTCCTACAAATTTAGAGTGGAGCCCCATCGGC<br>ACCATGGCGGTTCTTGGCATCACCGTTGCCTTGCTTGCTCTCGAG  |
| pGL3-<br>0.9cyp2e1(MYC<br>mut)          | >cyp2e1(-850~+36,delete -756~-743)<br>ggtaccCTGGATGAACAAGCACATGGAACAAATCCAATTTTAAAAAATTTCTTCTTTTTTCTTC<br>TGTATTTGACAAAGTGTTTTGAAAAACATTTCCACCTAAGTGGGGCTGTTGAAGGACAG<br>GTAGTACCTTTCAGGTGCTCTTGCCTAGCATGTGCAAGGCCCTGGGTTTGGTCCTTGGCA<br>CTGCAAATATTCGCTTACACAGACACTCAGAATATCTCAAAGTGCTTTAGCTTTATTTAC<br>CTCTACTTTTTTGCCTCCATGGAATTTTCTGGTTGATTTGACAACGTGAAATGGGATCCA<br>GAAGTGAGATTTCTGTTCTGCCCTCAATTTCCAGGTGGGCCATTAGGGTTGTGGTGCCA<br>GATCAGAAGTTAGAGGTCTGCAGCCTAGTGCTGTCTTTGGCCTGGAATGAGCAGTAAATG<br>GTTGGAAAAAAACCTTTCCAGCAAACAAACACATGCAAACATGATCTGAATGCATGCC<br>TTCTGTGCTGACCAGTGCCATGGGGAAGACATTCCCCACCCCCAGGACTGACCTATGAA                                                                                                                                                                                                                                                                                                                                                                                   |

TTGGTGAGGTATTCTACATGTACTCACCAGCACCTGACAGGTGCCAGCAACCAGAGGA  
TTGGCAGGGCCCAGCCTCATCCTTGTGATCAGTAGATGCAACTTCTAAGAGGCAATGG  
CTCCAAGGGTCAGCCTTTGAAATGATAGCCAACCTGCAGCTAATAATAAACCCAGCACTTA  
GGCCAAGGGAGATGAGTGGTTATTGGCTGATGAGCCACCCTCCTTCTCAACGACACGTTA  
TAAAATCCTTGTTTCTCCTCAGGAAATTCCTACAAATTTAGAGTGGAGCCCCATCGGCAC  
CATGGCGGTTCTTGGCATCACCGTTGCCTTGCTTGTCTCTCGAG

---

**Table S3. Upstream regulators of CYP2E1 screened by Co-IP-MS.**

| Upstream Regulator | Molecule Type           | p-value of overlap |
|--------------------|-------------------------|--------------------|
| BMI1               | transcription regulator | 3.55E-04           |
| MYC                | transcription regulator | 1.08E-03           |
| SIRT1              | transcription regulator | 1.25E-03           |
| TBPL1              | transcription regulator | 1.27E-03           |
| CEBPZ              | transcription regulator | 2.07E-02           |
| NUPR1              | transcription regulator | 4.39E-03           |
| HNF1A              | transcription regulator | 5.07E-03           |
| TP53               | transcription regulator | 5.70E-03           |
| PIAS3              | transcription regulator | 8.39E-03           |
| SPDEF              | transcription regulator | 9.80E-03           |
| CCND1              | transcription regulator | 1.10E-02           |
| E2F4               | transcription regulator | 1.13E-02           |
| STAT1              | transcription regulator | 2.02E-02           |
| MEF2B              | transcription regulator | 2.07E-02           |
| NKX2-8             | transcription regulator | 2.07E-02           |
| ERG                | transcription regulator | 2.34E-02           |
| CBX3               | transcription regulator | 2.46E-02           |
| MYOD1              | transcription regulator | 2.55E-02           |
| EGR3               | transcription regulator | 2.81E-02           |
| E2F3               | transcription regulator | 3.06E-02           |
| SNAI2              | transcription regulator | 3.29E-02           |
| MAX                | transcription regulator | 3.57E-02           |
| YAP1               | transcription regulator | 3.96E-02           |
| TEAD3              | transcription regulator | 4.10E-02           |
| PLAGL2             | transcription regulator | 4.10E-02           |
| GLIS2              | transcription regulator | 4.24E-02           |
| SMARCB1            | transcription regulator | 4.58E-02           |
| ELF1               | transcription regulator | 4.74E-02           |
| PROX1              | transcription regulator | 4.74E-02           |

**Table S4. Echocardiographic characteristics of WT mice 2 weeks after TAC treatment.**

| Group     | Sham       | TAC         |
|-----------|------------|-------------|
| Number    | n=12       | n=12        |
| LVDD, mm  | 3.55±0.31  | 3.59±0.29   |
| LVDS, mm  | 2.32±0.24  | 2.38±0.32   |
| LVPWD, mm | 0.60±0.16  | 0.71±0.12   |
| LVPWS, mm | 0.85±0.17  | 1.05±0.17** |
| LVFS, %   | 34.27±3.91 | 36.18±5.79  |

LVDD: left ventricle (LV) diameter at end diastole; LVDS: LV diameter at end systole; LVPWD: LV posterior wall thickness at end diastole; LVPWS: LV posterior wall thickness at end systole; LVFS: LV fractional shortening. \*\* $P < 0.01$  TAC *versus* Sham control.

**Table S5. Echocardiographic characteristics of WT mice 4 weeks after TAC treatment.**

| Group     | Sham       | TAC          |
|-----------|------------|--------------|
| Number    | n=11       | n=13         |
| LVDD, mm  | 3.63±0.24  | 3.63±0.28    |
| LVDS, mm  | 2.38±0.26  | 2.41±0.48    |
| LVPWD, mm | 0.61±0.12  | 0.82±0.13*** |
| LVPWS, mm | 0.88±0.14  | 1.16±0.12*** |
| LVFS, %   | 33.64±4.57 | 38.35±6.51*  |

LVDD: left ventricle (LV) diameter at end diastole; LVDS: LV diameter at end systole; LVPWD: LV posterior wall thickness at end diastole; LVPWS: LV posterior wall thickness at end systole; LVFS: LV fractional shortening. \* $P < 0.05$ , \*\*\* $P < 0.001$  TAC *versus* Sham control.

**Table S6. Echocardiographic characteristics of WT mice 8 weeks after TAC treatment.**

| Group     | Sham       | TAC         |
|-----------|------------|-------------|
| Number    | n=6        | n=12        |
| LVDD, mm  | 3.69±0.59  | 3.77±0.60   |
| LVDS, mm  | 2.41±0.48  | 2.59±0.76   |
| LVPWD, mm | 0.63±0.07  | 0.77±0.11** |
| LVPWS, mm | 0.89±0.12  | 1.06±0.17*  |
| LVFS, %   | 33.73±6.05 | 30.16±8.26  |

LVDD: left ventricle (LV) diameter at end diastole; LVDS: LV diameter at end systole; LVPWD: LV posterior wall thickness at end diastole; LVPWS: LV posterior wall thickness at end systole; LVFS: LV fractional shortening. \* $P < 0.05$ , \*\* $P < 0.01$  TAC *versus* Sham control.



**Table S7. Echocardiographic characteristics of WT mice 2 weeks after cessation of ADR treatment.**

| Group       | Saline     | ADR          |
|-------------|------------|--------------|
| Number      | n=10       | n=8          |
| LVDD, mm    | 3.46±0.21  | 3.59±0.19    |
| LVDS, mm    | 2.19±0.22  | 2.53±0.15    |
| LVPWD, mm   | 0.59±0.07  | 0.49±0.06**  |
| LVPWS, mm   | 0.85±0.09  | 0.69±0.09*   |
| SV, $\mu$ l | 38.18±5.92 | 35.12±3.32   |
| LVFS, %     | 36.73±4.86 | 28.45±5.15** |

LVDD: left ventricle (LV) diameter at end diastole; LVDS: LV diameter at end systole; LVPWD: LV posterior wall thickness at end diastole; LVPWS: LV posterior wall thickness at end systole; LVFS: LV fractional shortening; SV: stroke volume. \* $P$ <0.05, \*\* $P$ <0.01 ADR *versus* Saline control.

**Table S8. Canonical pathways interacted with CYP2E1 screened by Co-IP-MS.**

| Ingenuity Canonical Pathways                            | $-\log(\text{p-value})$ | Ratio    |
|---------------------------------------------------------|-------------------------|----------|
| p70S6K Signaling                                        | 2.26E+00                | 6.06E-02 |
| Phospholipase C Signaling                               | 1.97E+00                | 4.55E-02 |
| ERK5 Signaling                                          | 1.97E+00                | 7.58E-02 |
| mTOR Signaling                                          | 1.67E+00                | 4.48E-02 |
| Cardiac Hypertrophy Signaling                           | 1.66E+00                | 4.26E-02 |
| G Protein Signaling Mediated by Tubby                   | 1.58E+00                | 9.38E-02 |
| Protein Kinase A Signaling                              | 1.46E+00                | 3.49E-02 |
| PI3K Signaling                                          | 1.31E+00                | 4.62E-02 |
| ERK/MAPK Signaling                                      | 1.29E+00                | 4.00E-02 |
| Gαq Signaling                                           | 6.43E-01                | 3.11E-02 |
| JAK/Stat Signaling                                      | 6.27E-01                | 3.61E-02 |
| TGF-β Signaling                                         | 5.89E-01                | 3.45E-02 |
| Apoptosis Signaling                                     | 5.62E-01                | 3.33E-02 |
| SAPK/JNK Signaling                                      | 4.54E-01                | 2.88E-02 |
| Wnt/Ca+ pathway                                         | 4.37E-01                | 3.17E-02 |
| HGF Signaling                                           | 3.85E-01                | 2.61E-02 |
| ErbB4 Signaling                                         | 3.67E-01                | 2.78E-02 |
| RhoA Signaling                                          | 3.37E-01                | 2.42E-02 |
| Wnt/β-catenin Signaling                                 | 3.37E-01                | 2.33E-02 |
| FGF Signaling                                           | 2.58E-01                | 2.20E-02 |
| Death Receptor Signaling                                | 2.49E-01                | 2.15E-02 |
| STAT3 Pathway                                           | 2.31E-01                | 2.06E-02 |
| AMPK Signaling                                          | 0.00E+00                | 1.39E-02 |
| PKCθ Signaling in T Lymphocytes                         | 0.00E+00                | 1.89E-02 |
| Role of MAPK Signaling in the Pathogenesis of Influenza | 0.00E+00                | 1.39E-02 |

**Figure S1. Cumulative percent mortality for mouse models.**

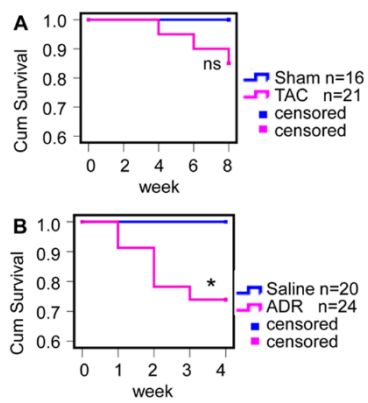

**A**, WT-sham ( $n=16$  mice) and WT-TAC ( $n=21$  mice) mice was calculated every two weeks until the eighth week after TAC (non significant *versus* TAC group). **B**, WT-saline ( $n=20$  mice) and WT-ADR ( $n=24$  mice) mice was calculated every week until 2 weeks after cessation of ADR treatment ( $*P<0.05$  *versus* saline group).

**Figure S2. CYP2E1 increased oxidative stress and apoptosis in mice.**

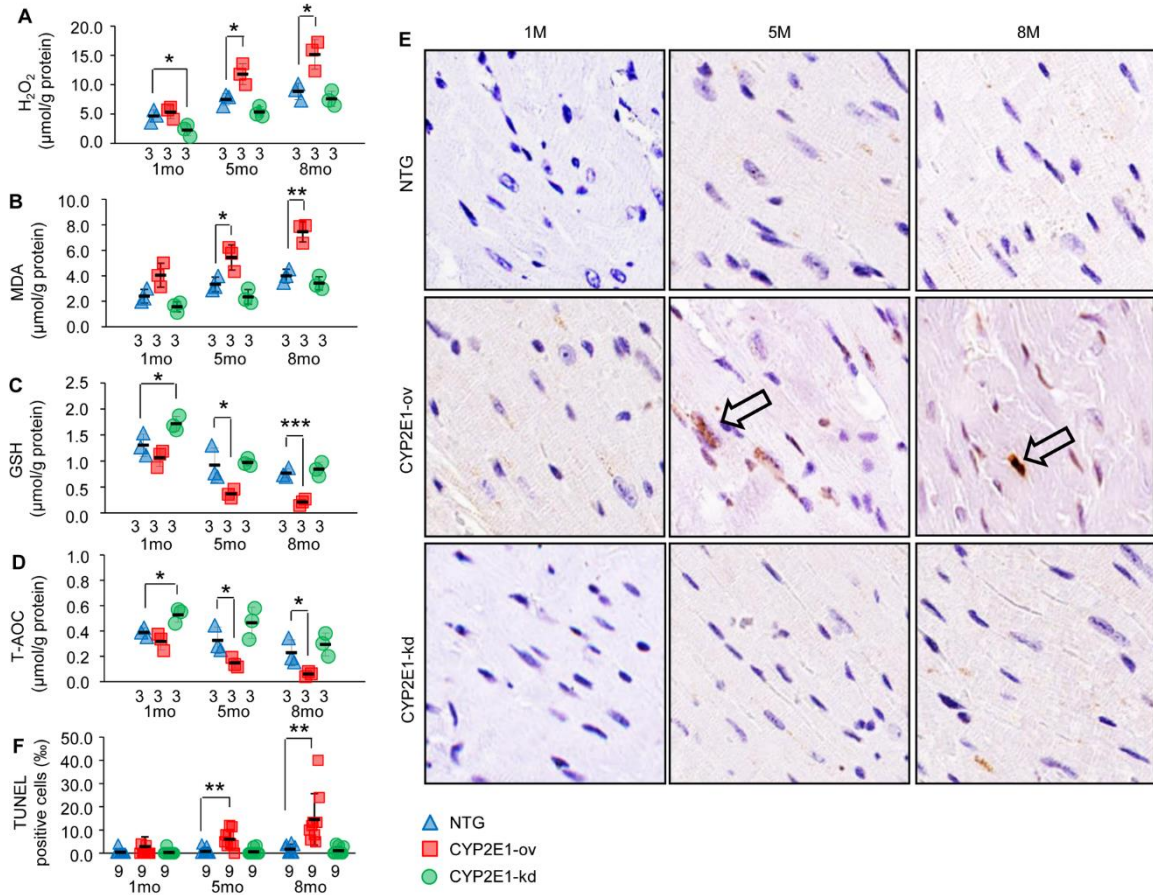

Level of H<sub>2</sub>O<sub>2</sub> (**A**), malondialdehyde (MDA) (**B**), glutathione (GSH) (**C**) and total antioxidation capacity (T-AOC) (**D**) in heart tissues from NTG, CYP2E1-ov and CYP2E1-kd transgenic mice at 1, 5 and 8 months of age (\*  $P < 0.05$ , \*\*  $P < 0.01$  or \*\*\*  $P < 0.001$  versus NTG group). **E**, Representative photographs of heart tissue used for TUNEL assay. The arrows indicate TUNEL-positive cells (magnification,  $\times 400$ ). **F**, The quantitative analysis of apoptotic cells in the hearts tissues from NTG, CYP2E1-ov and CYP2E1-kd transgenic mice at 1, 5 and 8 months of age ( $n = 3$  mice per group,  $n = 3$  microscopic fields per mice, \*\*  $P < 0.01$  versus NTG group).
